# Supplementary material for: Validation of Enzyme Immunoassays via an Adrenocorticotrophic Stimulation Test for the Non-Invasive Quantification of Stress-Related Hormone Metabolites in Naked Mole-Rats
Source: MDPI journal article supplement (doi:10.3390/ani13081424), 2023-04-21
Supplement: s1 [file s1]

### Supplementary Materials:

**Table S1.** Summary of saline volume and synthetic adrenocorticotrophic hormone (Synacthen® depot, Novartis, South Africa (Pty) Ltd.) administered to each individual during the ACTH challenge.

| ID | Sex    | Dosage (µg/100g) | Mass (g) | Synacthen Volume (µL) | Saline Volume (µL) |
|----|--------|------------------|----------|-----------------------|--------------------|
| F1 | Female | 20               | 45.1     | 36                    | 164                |
| F2 | Female | 20               | 35.6     | 28                    | 172                |
| F3 | Female | 20               | 38.2     | 31                    | 169                |
| M1 | Male   | 20               | 53.3     | 43                    | 157                |
| M2 | Male   | 20               | 40.5     | 33                    | 167                |
| M3 | Male   | 20               | 38.5     | 31                    | 169                |
| F4 | Female | 60               | 43.0     | 103                   | 97                 |
| F5 | Female | 60               | 56.4     | 135                   | 65                 |
| F6 | Female | 60               | 50.1     | 120                   | 80                 |
| M4 | Male   | 60               | 35.5     | 85                    | 115                |
| M5 | Male   | 60               | 33.2     | 80                    | 120                |
| M6 | Male   | 60               | 39.4     | 95                    | 105                |

**Table S2.** Summary of EIA sensitivities and, intra-assay and inter-assay coefficients of variation of high and low value quality controls for all EIAs applied to measure immunoreactive urine glucocorticoid metabolite (uGCM) and fecal glucocorticoid metabolite in naked mole-rats.

| Sensitivity                        |               |                             |                           |                           |
|------------------------------------|---------------|-----------------------------|---------------------------|---------------------------|
| Enzyme immunoassay                 | Urine (pg/mL) | Feces (ng/g fecal dry mass) | Intra-assay variation (%) | Inter-assay variation (%) |
| Corticosterone                     | 80            | 2.4                         | 4.57–5.74                 | 10.60–13.49               |
| Cortisol                           | 25            | 0.75                        | 4.42–6.24                 | 14.11–14.89               |
| 11-oxoetiocholanolone I            | 40            | 1.2                         | 4.09–4.81                 | 14.28–14.85               |
| 11-oxoetiocholanolone II           | 25            | 0.75                        | 4.94–6.84                 | 10.91–12.74               |
| 5α-pregnane-3β,11β,21-triol-20-one | 80            | 2.4                         | 4.71–5.71                 | 9.98–12.81                |
